# Supplementary material for: Dissolution dynamics of a suspension droplet in a binary solution for controlled nanoparticle assembly
Source: Royal Society of Chemistry journal article supplement (doi:10.1039/c7nr02704d), 2017-01-01

Supporting Information

## **Dissolution Dynamics of a Suspension Droplet in a Binary Solution for Controlled Nanoparticle Assembly**

Ziyang Lu, Amgad Rezk, Fernando Jativa, Leslie Yeo, and Xuehua Zhang,

Soft Matter & Interfaces Group, School of Engineering, RMIT University, Melbourne, VIC  
3001, Australia, Micro/Nanophysics Research Laboratory, School of Engineering, RMIT  
University, Melbourne, VIC 3001, Australia, and Department of Mechanical Engineering,  
University of Melbourne, Parkville, VIC 3010, Australia

E-mail: [xuehua.zhang@rmit.edu](mailto:xuehua.zhang@rmit.edu).

Figure S1 Optical images of the toroidal assembly of (a) 100 nm Fe<sub>3</sub>O<sub>4</sub>@SiO<sub>2</sub> nanoparticles and (b) 200 nm silica nanorods. (c) SEM image of the detailed structure of silica nanorods assembly shows irregular packing of the nanostructure.

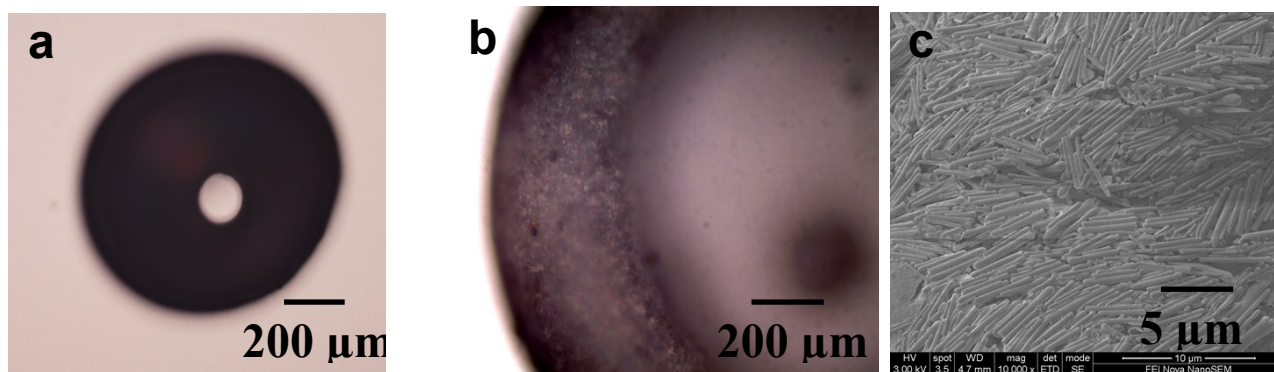

Figure S2 Toroidal assembly from binary mixture of silica nanoparticles of 300 nm and 200 nm at the ratio of 1:1.

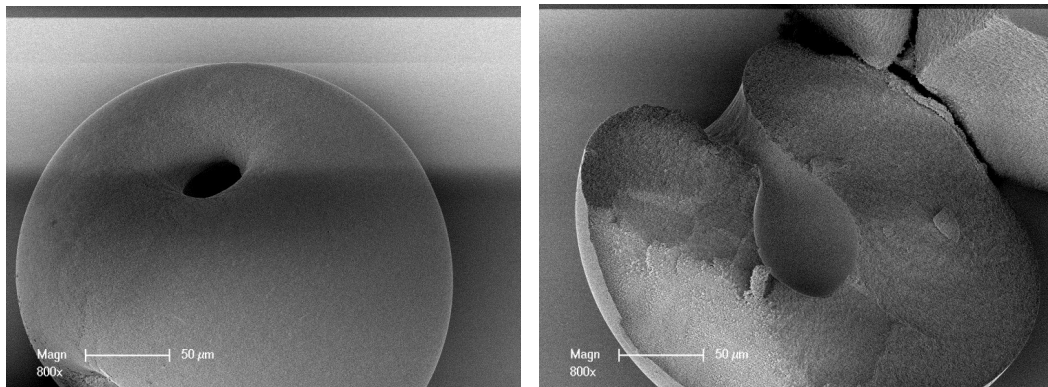

Supplement: c7nr02704d3.pdf [file c7nr02704d3.pdf]
